# Supplementary material for: Effects of microsurface structure of bioactive nanoparticles on dentinal tubules as a dentin desensitizer
Source: PubMed Central journal article supplement (PMC7437925; doi:10.1371/journal.pone.0237726), 2020-08-19
Supplement: pone.0237726.s003.pdf [file pone.0237726.s003.pdf]

# CERTIFICATE OF TRANSLATION

June 28, 2020

---

This document certifies that the paper titled  
**Effects of microsurface structure of bioactive nanoparticles on dentinal tubules as a dentin desensitizer**  
has been translated and edited for language by professionals at Editage, a division of Cactus Communications, under the job code DOSVP\_I.

Disclaimer: We do not bear responsibility for revisions made to the document after our translation on **February 7, 2020**.

*Vikas Narang*

Vikas Narang,  
Chief Operating Officer,  
Editage

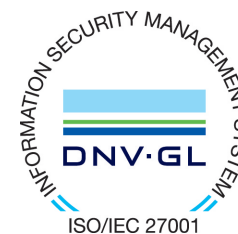

---

**Worldwide**  
request@editage.com  
+1 877-334-8243  
www.editage.com

**Japan**  
submissions@editage.com  
+81 03-6868-3348  
www.editage.jp

**Korea**  
submit-korea@editage.com  
1544-9241 (free dial)  
www.editage.co.kr

**China**  
fabiao@editage.cn  
400-005-6055  
www.editage.cn

**Brazil**  
inquiry-brazil@editage.com  
0880-892-20-97  
www.editage.com.br

**Taiwan**  
submitjobs@editage.com  
02-2657-0306  
www.editage.com.tw
